# Supplementary material
Source: PubMed Central journal article supplement (PMC8769166)
Supplement: NIHMS1753661-supplement-Supp_Materials.pdf [file NIHMS1753661-supplement-Supp_Materials.pdf]

**Cell Metabolism, Volume 33**

**Supplemental information**

**Fasting-mimicking diet blocks triple-negative  
breast cancer and cancer stem cell escape**

**Giulia Salvadori, Federica Zanardi, Fabio Iannelli, Riccardo Lobefaro, Claudio Vernieri, and Valter D. Longo**

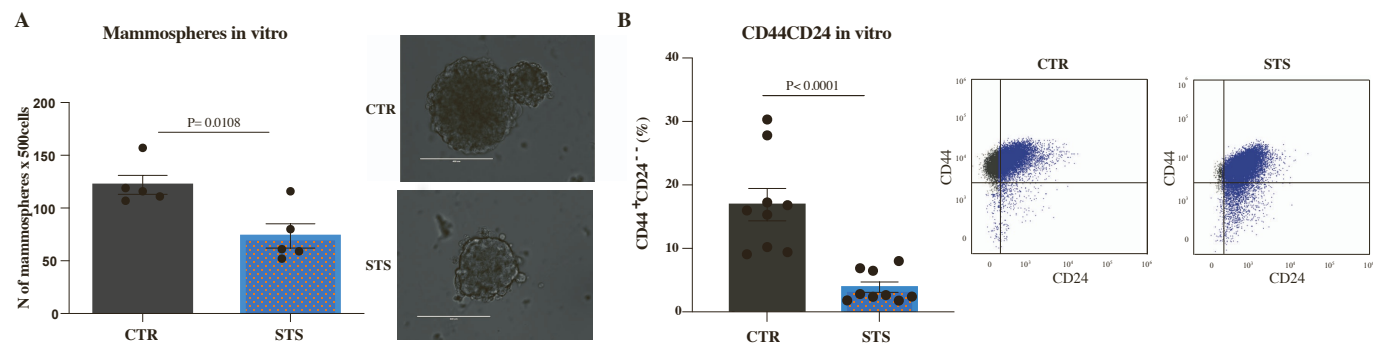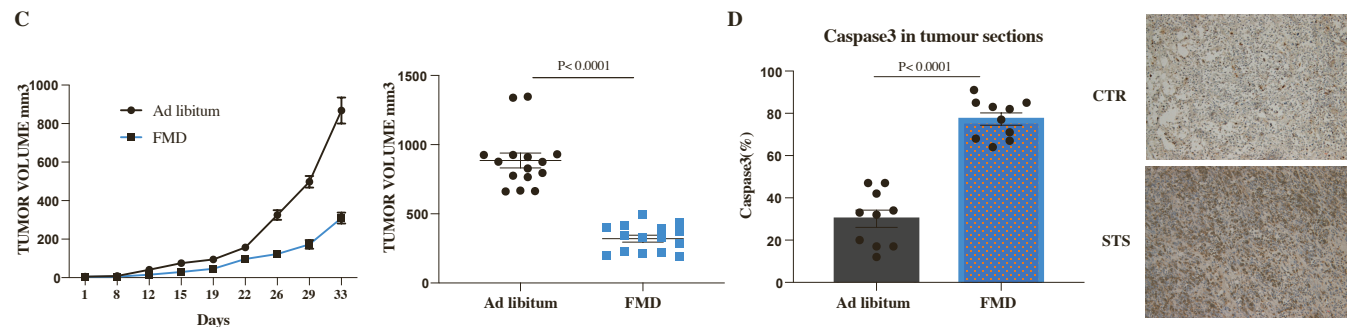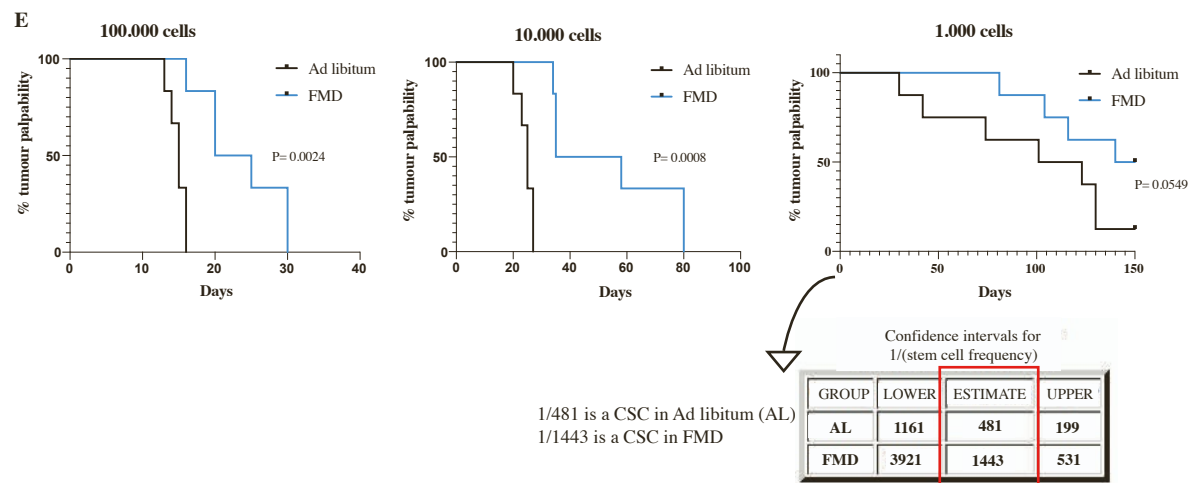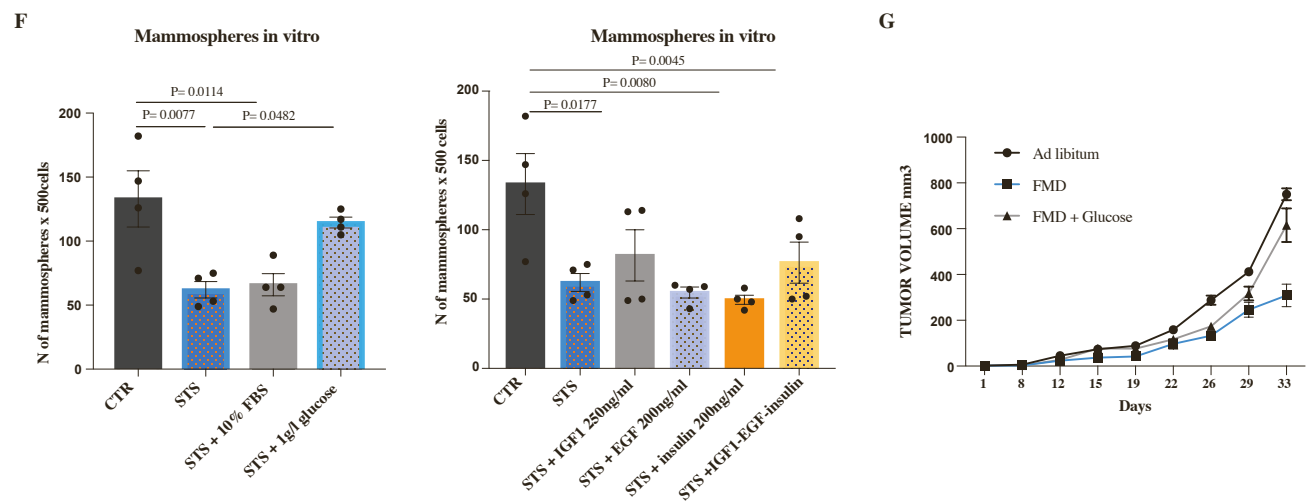

**Figure S1. FMD effects on CSCs are glucose dependent. Related to Figure 1.**

A) SUM159 cells were grown under control (CTR: 1g/l Glucose, 10%FBS) and starved (STS: 0,5g/l, 1%FBS) conditions for a total of 48h. Cells were then plated to perform the sphere forming assay. The number and the morphology of representative SUM159 spheres, after 8 days of *in vitro* culture (n= 5 biological replicates) are shown.

B) FACS analysis were performed to measure CD44 and CD24 expression in SUM159 breast cancer cell line *in vitro* (n= 9 biological replicates).

C) Growth of SUM159 xenografts in 8-weeks old female NOD scid (NSG) treated with AL diet or 5 cycles of FMD (n=15).

D) The expression of Cas-3 protein was examined by IHC staining in SUM159 tumor masses slides (n= 10, slides of different tumors, per group). Cas-3 positive cells were quantified with cell counter ImageJ plugin.

E) SUM159 tumor cells derived from *in vivo* xenografts were injected in recipient mice at different dilution to perform the limiting dilution assay (n=6-8). The stem cell frequency was calculated using ELDA software. P values were determined by Log-rank (Mantel-Cox) test.

F) SUM159 cells were grown under CTR (1g/l Glucose, 10%FBS), STS (0,5g/l, 1%FBS), STS + 1g/l glucose-1%FBS, STS + 10%FBS-0,5g/l glucose and STS + 0,5g/l glucose-1%FBS and single FBS components at CTR concentration level (IGF-1: 250ng/ml, EGF: 200ng/ml, Insulin: 200ng/ml) for a total of 48h. Cells were then plated to perform the *in vitro* sphere forming assay (n=4 biological replicates).

G) Growth of SUM159 xenografts in 8-weeks old female NOD scid (NSG) mice treated with AL diet or 5 cycles of FMD alone or plus 3% glucose supplementation in drinking water (n=9).

Data are represented as mean  $\pm$  SEM.

P values were determined by two-tailed unpaired t test (Fig. S1A-D) and one-way Anova (Fig. S1F).

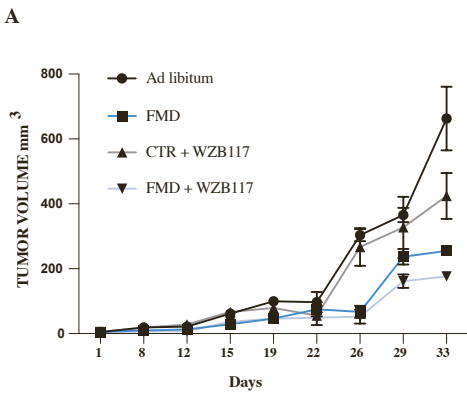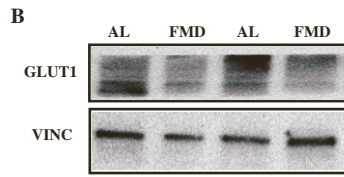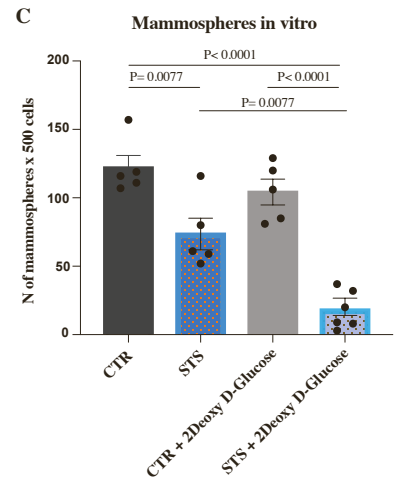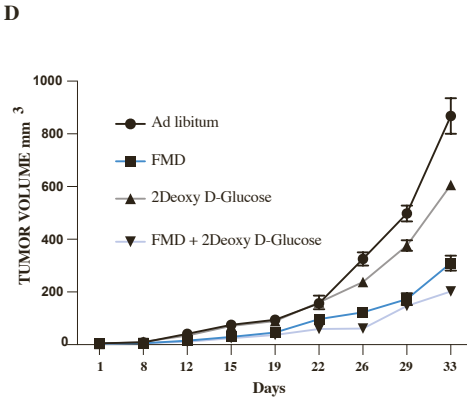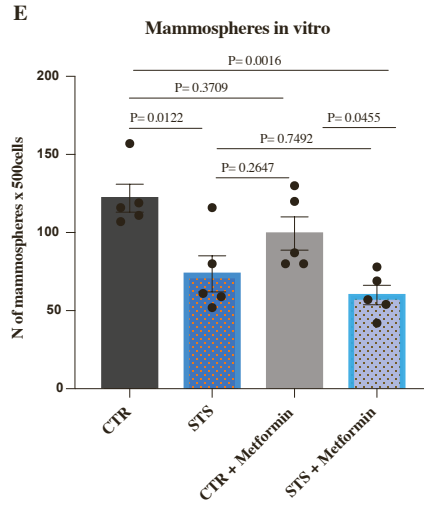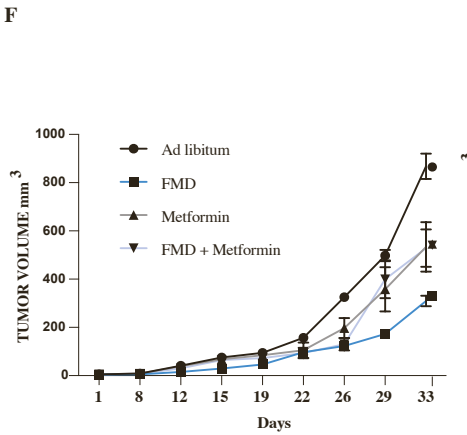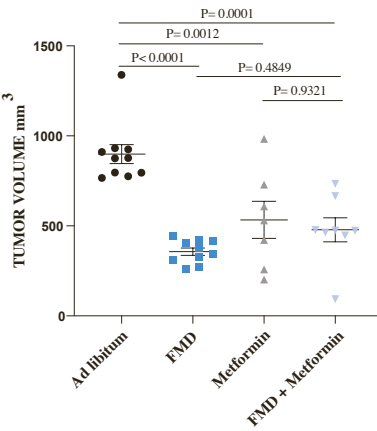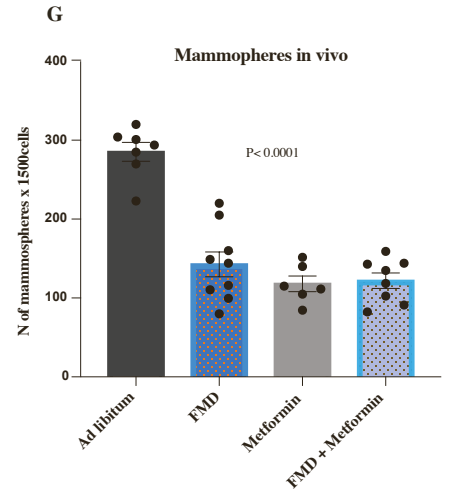

**Figure S2. FMD effects on CSCs are potentiated by 2-Deoxy-D-Glucose but not by metformin. Related to Figure 1.**

A) Growth of SUM159 xenografts in 8-weeks old female NOD scid (NSG) mice treated with AL diet or 5 cycles of FMD alone or combined with WZB117 (10mg/kg) once a day, i.p. (n=6).

B) Detection of GLUT1 levels and VINCULIN, as loading control, in SUM159 xenografts.

C) SUM159 cells were grown under control (CTR: 1g/l Glucose, 10%FBS) and starved (STS: 0,5g/l, 1%FBS) conditions for 48h, and then treated with placebo or 2DG (4mM). Cells were then plated to perform the sphere forming assay (n=5 biological replicates).

D) Growth of SUM159 xenografts in 8-weeks old female NOD scid (NSG) mice treated with AL diet or 5 cycles of FMD alone or combined with 2DG (500mg/kg) once a day, i.p (n=15-16).

E) SUM159 cells were grown under control (CTR: 1g/l Glucose, 10%FBS) and starved (STS: 0,5g/l, 1%FBS) conditions for 48h, and then treated with placebo or metformin (5mM). Cells were then plated to perform the sphere forming assay (n=5 biological replicates).

F) Growth of SUM159 xenografts in 8-weeks old female NOD scid (NSG) mice treated with AL diet or 5 cycles of FMD alone or combined with metformin (150mg/kg) once a day, i.p. (n=7-10).

G) Tumor masses were excised and used to perform the *ex vivo* sphere forming assay (n=7-9).

Data are represented as mean  $\pm$  SEM. P values were determined by one-way Anova.

A

## Mammospheres in vitro

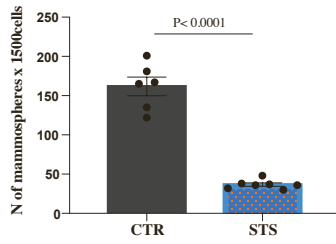

B

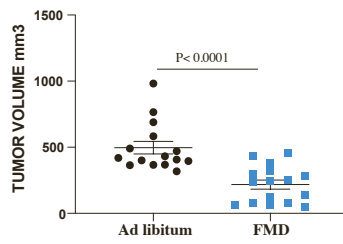

C

## CD4424 in vivo

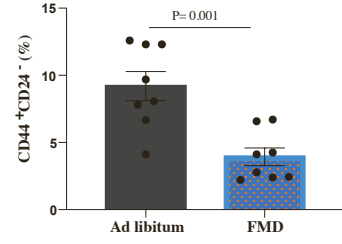

D

ALDH1<sup>+</sup> in vivo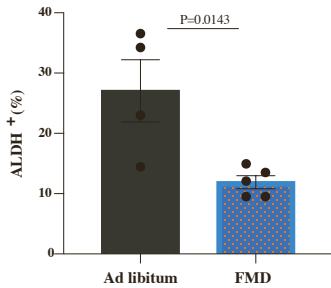

E

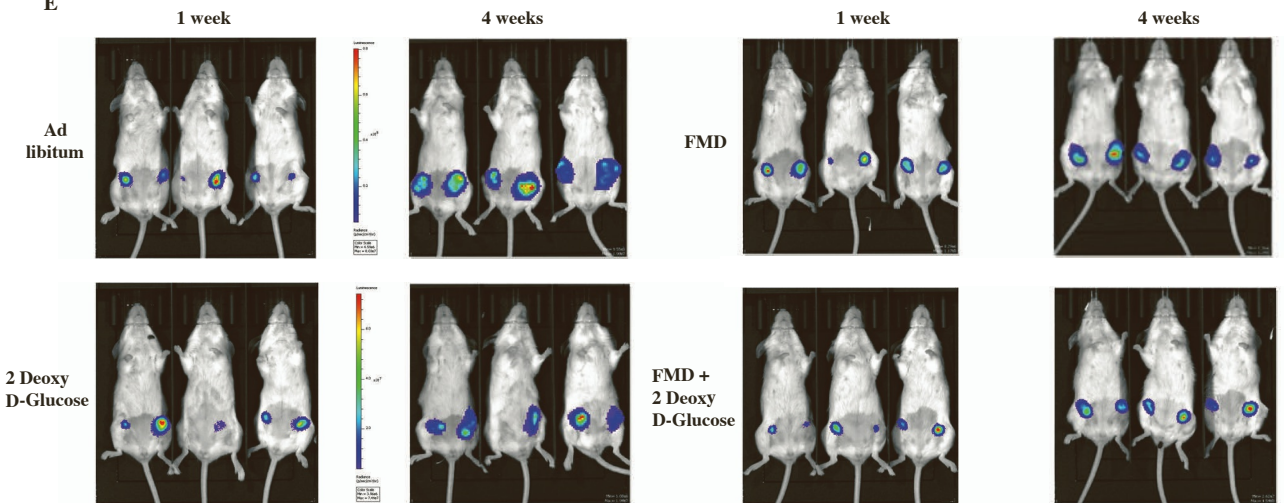

F

## 10 days post cells injection

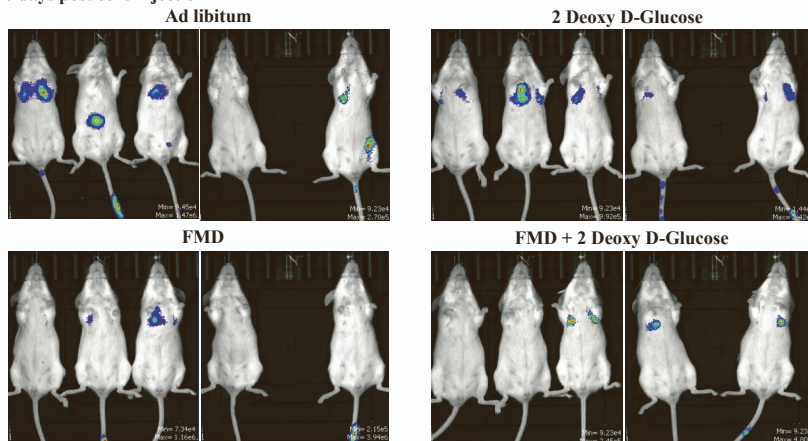

G

## 4T1-Luc expression intravenously

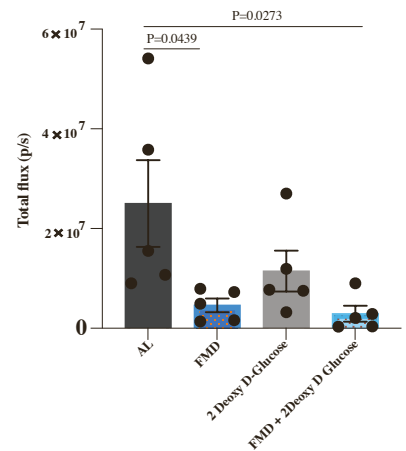

**Figure S3. FMD effects in a syngeneic model of TNBC. Related to Figure 2.**

A) 4T1 cells were grown under control (CTR: 1g/l Glucose, 10%FBS) and starved (STS: 0,5g/l, 1%FBS) conditions for a total of 48h. Cells were then plated to perform the sphere forming assay (n=6-7 biological replicates).

B) Growth of 4T1 xenografts in 6-weeks old female Balb-c mice treated with AL diet or subjected to 4 cycles of FMD. (n=15-16 per group).

C) FACS analysis were performed to measure CD44 and CD24 expression in 4T1 xenografts (n= 8).

D) Aldefluor analysis were performed by flow cytometry using the ALDEFLUOR kit, to measure ALDH1 expression in 4T1 tumor masses (n=4-5).

E) Growth of 4T1 xenografts in 6-weeks old female Balb-c mice treated with AL diet or subjected to 4 cycles of FMD, alone or combined with 2DG (500mg/kg) once a day, i.p. Tumor progression was monitored with bioluminescent imaging 1 week and 4 weeks after 4T1-luc cells injection in the mammary fat pad.

F) Growth of 4T1-luc cells intravenously in 6-weeks old female Balb-c mice treated with AL diet or 4 cycles of FMD alone or combined with 2DG (200mg/kg) once a day, i.p. Tumor progression was monitored with bioluminescent imaging 10 days post cells injection.

G) Total photon effluxes 17 days post cells injection were measured (n=5 per group).

Data are represented as mean  $\pm$  SEM. P values were determined by two tailed unpaired t test (Fig. S3 A-D) and one-way Anova (Fig. S3 G).

A

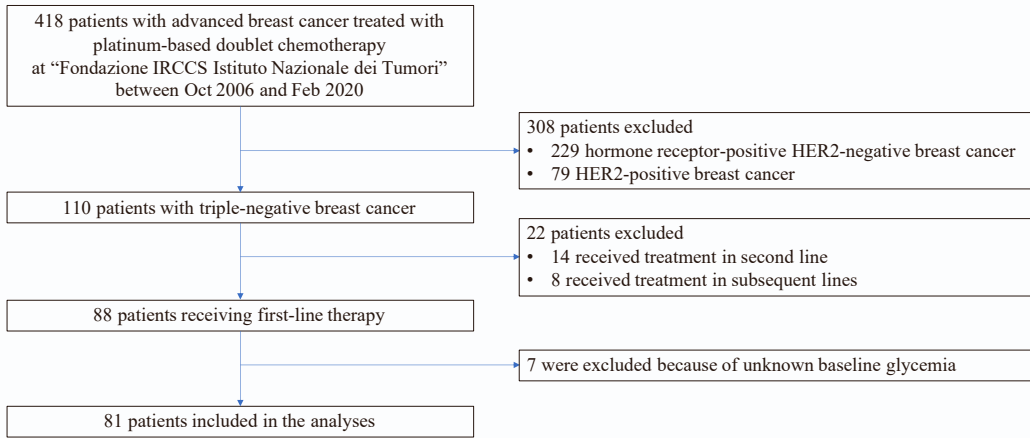

B

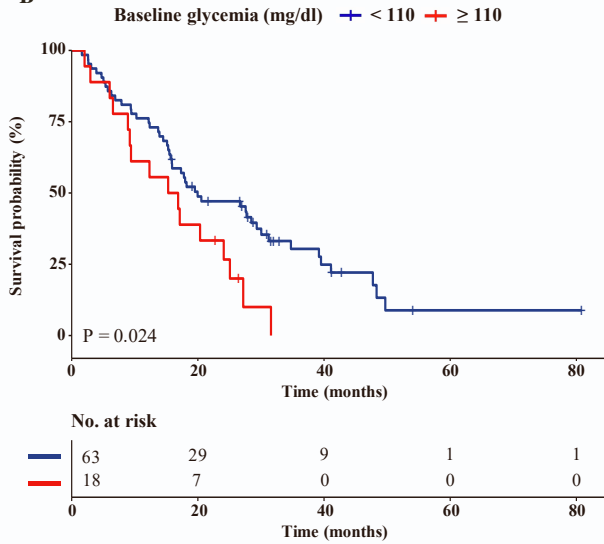

C

| Multivariable analysis for OS                         |      |             |         |
|-------------------------------------------------------|------|-------------|---------|
| Variables                                             | HR   | 95% CI      | P value |
| Baseline glycemia<br>$\geq$ 110 mg/dl vs. < 110 mg/dl | 1.83 | 0.91 – 3.68 | 0.092   |
| ECOG PS<br>1 vs. 0                                    | 4.72 | 2.29 – 9.73 | < 0.001 |
| <i>De novo</i> metastatic disease<br>Yes vs. No       | 0.18 | 0.02 – 1.45 | 0.108   |
| Previous taxanes<br>Yes vs. No                        | 1.21 | 0.57 – 2.59 | 0.620   |
| N° of metastatic sites<br>>3 vs. $\leq$ 3             | 0.52 | 0.18 – 1.46 | 0.211   |
| Lung metastasis<br>Yes vs. No                         | 1.96 | 0.99 – 3.89 | 0.054   |
| Liver metastasis<br>Yes vs. No                        | 2.21 | 1.08 – 4.51 | 0.029   |
| Bone metastasis<br>Yes vs. No                         | 1.40 | 0.70 – 2.78 | 0.339   |



**Figure S4. Low baseline glycemia is associated with increased survival of TNBC patients.**

**Related to Figure 3.**

A) CONSORT flow diagram showing the selection of patients with advanced TNBC among a larger dataset of advanced breast cancer patients treated at Fondazione IRCCS Istituto Nazionale dei Tumori.

B) Kaplan-Meier curves for overall survival (OS) according to baseline blood glucose levels in advanced TNBC patients treated with first-line platinum-based doublet chemotherapy. Normoglycemia and hyperglycemia were defined according to 100 mg/dl threshold. The + symbol in Kaplan Meier curves indicates patients who were censored at the time of data cut-off analysis.

C) Multivariable analysis adjusting the impact of hyperglycemia on OS according to clinical characteristics previously selected on the basis of univariate analysis. For each covariate the hazard ratio (HR), 95% confidence interval (CI) and p value are indicated. CIs not crossing the value of 1 indicates a statistically significant impact of that variable on patient OS.

The p value is indicated in bold numbers when statistically significant.

**A**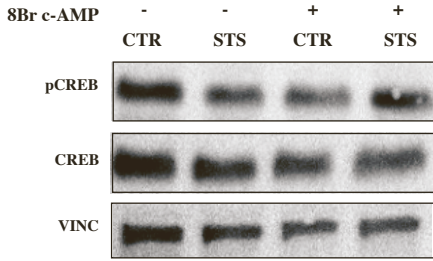**B**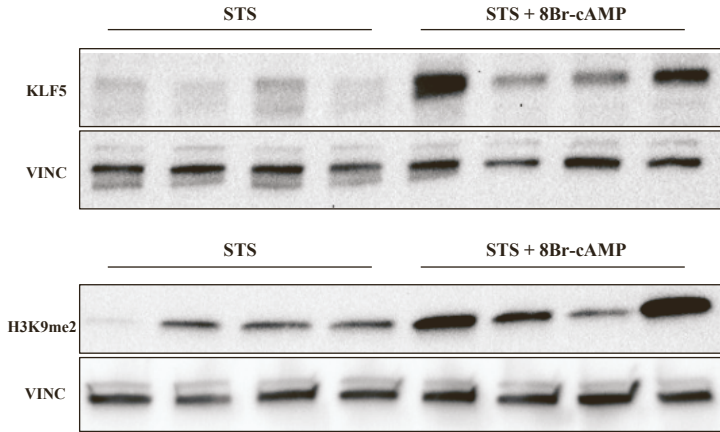**C**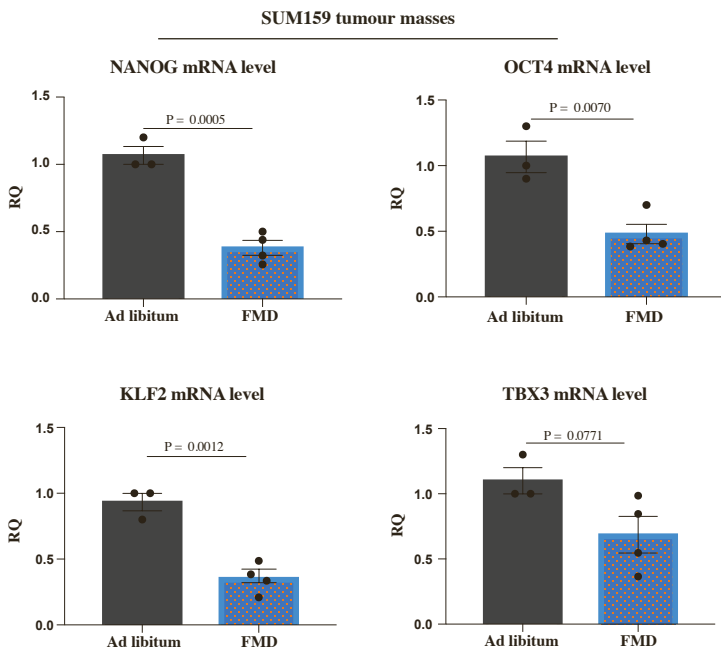

**Figure S5. FMD reduces the expression of stemness associated genes. Related to Figure 4.**

A) Detection of phosphorylated CREB levels, total CREB and VINCULIN, as loading control, in SUM159 cells after 48h in STS medium (0,5 g/L glucose and 1% FBS), alone or in combination with 8-Br-cAMP.

B) Detection of KLF5, H3meK9 levels and VINCULIN, as loading control, in SUM159 cell lysates (n=4 biological replicates).

C) qPCR analysis was performed on SUM159 xenografts bared by mice fed with FMD or standard diet (CTR) (n=3-4).

Data are represented as mean  $\pm$  SEM. P values were determined by two tailed unpaired t test.

A

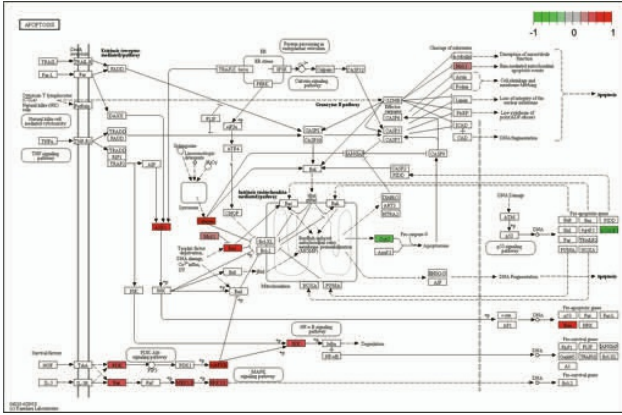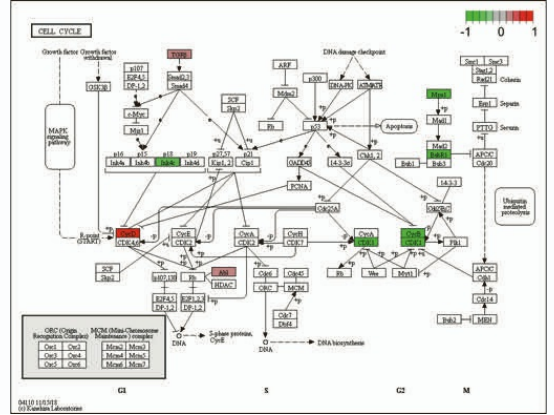

B

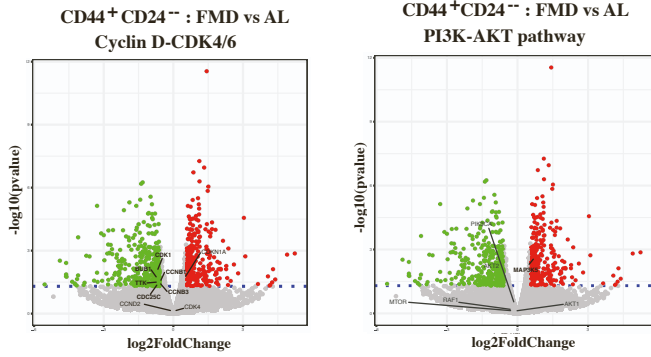

C

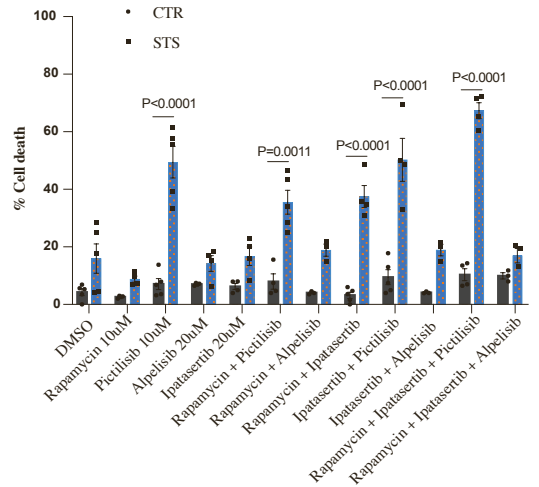

D

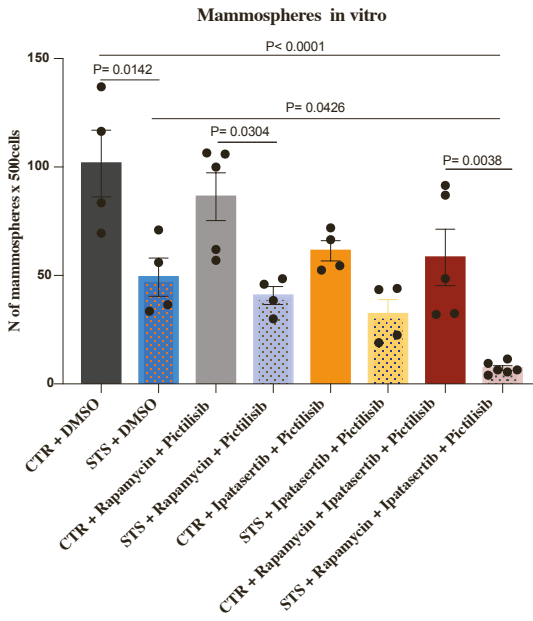

E

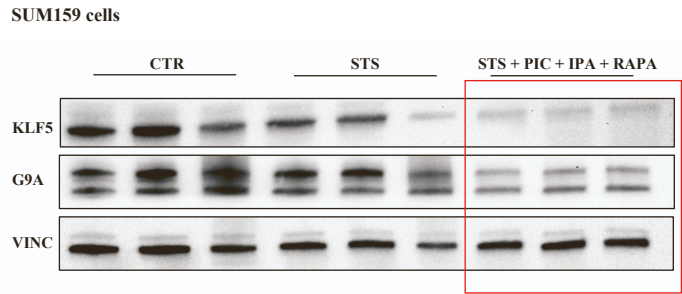

**Figure S6. PI3K/AKT, mTOR pathways inhibitors improve FMD effects against TNBC cancer cells and CSCs. Related to Figure 6.**

A) Graph representation of KEGG apoptosis (hsa04210) and KEGG cell cycle (hsa04110). Significantly up and downregulated genes (by comparing FMD versus AL) are depicted in red and green respectively.

B) Volcano plot showing the significance versus the log<sub>2</sub> fold-change in SUM159 tumor masses, in CD44<sup>+</sup>CD24<sup>-</sup> population, by comparing FMD versus AL. Up and downregulated genes ( $|\log_2FC| > 0.58$  and adj. p value  $< 0.05$ ) are displayed in red and green respectively. Deregulated genes involved in PI3K-AKT-mTOR and CycD-CDK4/6 pathways are highlighted. Significantly deregulated genes are reported in bold.

C) SUM159 cells were grown under CTR (1g/l Glucose, 10%FBS) and STS (0,5g/l, 1%FBS) conditions for a total of 48 hours. At 24h cells were treated with rapamycin (10 $\mu$ M), pictilisib (10 $\mu$ M), alpelisib (20 $\mu$ M) and ipatasertib (20 $\mu$ M), for 24hours, as single, double or triple treatments. Viability was assessed with erythrosine stain (n= 4-5 biological replicates), or

D) cells were plated to perform the sphere forming assay (n=4-6 biological replicates).

E) Detection of KLF5, G9A levels and VINCULIN, as loading control, in SUM159 cell lysates (n=3 biological replicates).

Data are represented as mean  $\pm$  SEM. P values were determined by multiple t-test (fig S6C) and one-way Anova (fig S6D).

**A**

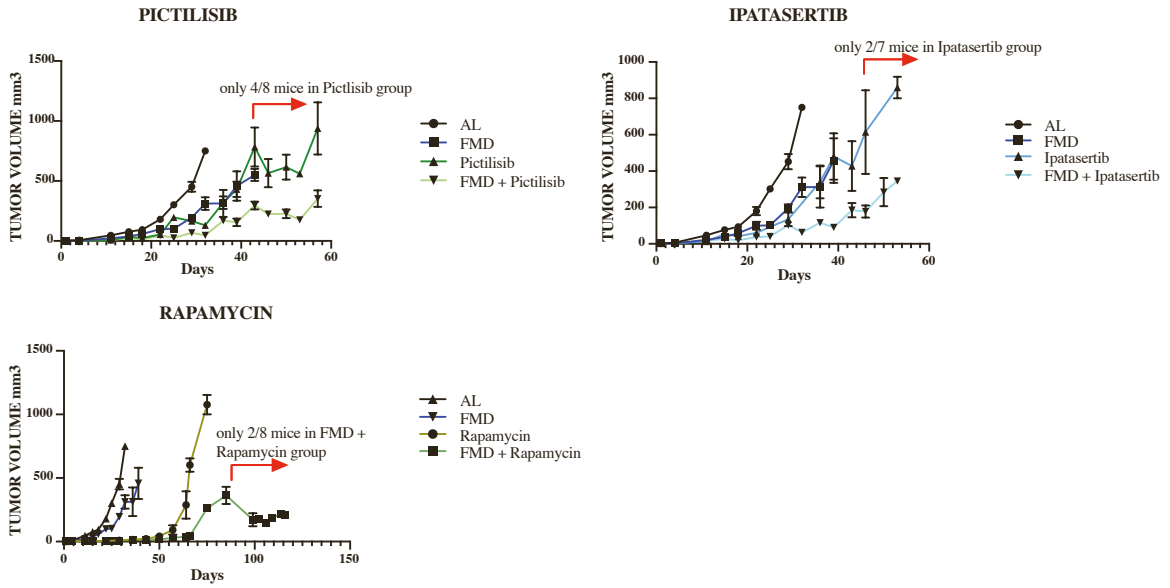

**B**

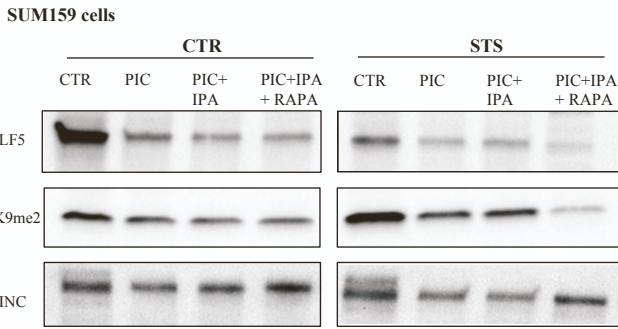

**C**

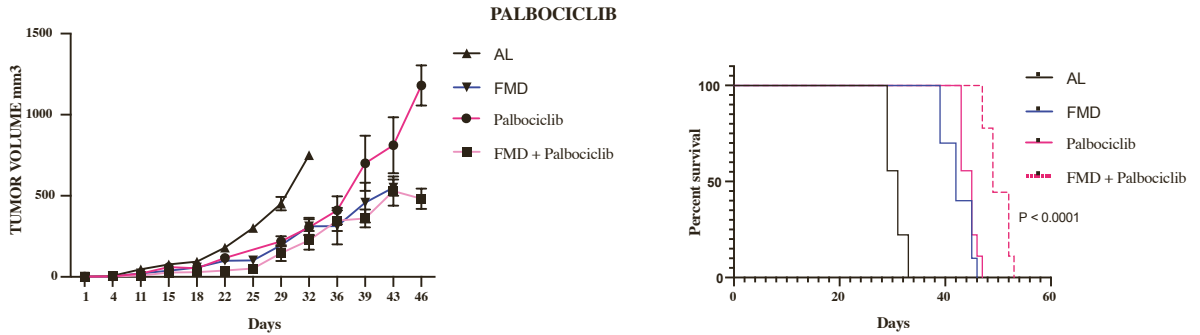

**D**

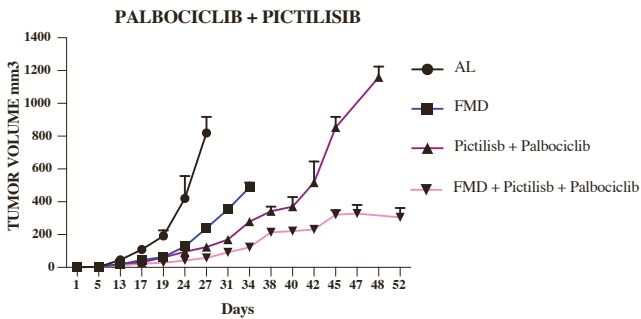

**E**

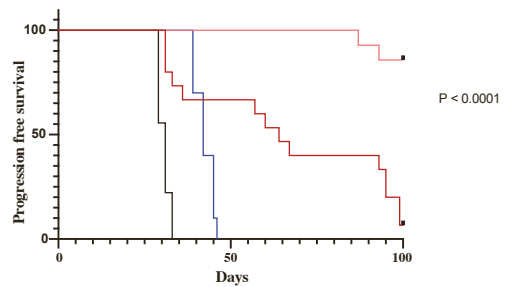

**Figure S7. PI3K/AKT, mTOR and CDK4/6 pathways inhibitors improve FMD effects in increasing mice survival. Related to Figure 6, 7.**

A) Growth of SUM159 xenografts in 8-weeks old female NOD scid (NSG) mice treated with AL diet FMD, alone or combined with pictilisib (100mg/kg, 5 consecutive days a week, by oral gavage), ipatasertib (75mg/kg, 5 consecutive days a week, by oral gavage) or rapamycin (2mg/kg, every other day, i.p.) (n=8-12).

B) Detection of KLF5, H3K9me2 levels and VINCULIN, as loading control, in SUM159 cell lysates (n=3 biological replicates).

C) Growth of SUM159 xenografts in 8-weeks old female NOD scid (NSG) mice treated with AL diet or FMD, alone or combined with palbociclib (62,5 mg/kg) every other day, by oral gavage. Survival curve is reported.

D) Growth of 4T1 xenografts in 6-weeks old female Balb-c mice treated with AL diet or FMD, alone or combined with palbociclib (62,5 mg/kg, by oral gavage, every other day) and pictilisib (100 mg/kg, by oral gavage, 5 consecutive days a week) (n=5).

E) Progression free survival related to experiment in Fig. 7D was monitored over time.

P values were determined by Log-rank (Mantel-Cox) test.

**Table S1. Characteristics of triple-negative breast cancer patients treated with platinum-based doublet chemotherapy. Related to Figure 3.**

|                                               | <b>Overall<br/>N. (%)</b> |
|-----------------------------------------------|---------------------------|
| <b>Age (years): median [range]</b>            | 56 [34-80]                |
| <b>First line platinum-based chemotherapy</b> | 81 (100)                  |
| <b>Treatment combination</b>                  |                           |
| Carboplatin + Paclitaxel                      | 50 (61.7)                 |
| Carboplatin + Gemcitabine                     | 31 (38.3)                 |
| <b>Baseline glycemia (threshold)</b>          |                           |
| Normoglycemic (< 100 mg/dl)                   | 50 (61.7)                 |
| Hyperglycemic (≥ 100 mg/dl)                   | 31 (38.3)                 |
| <b>Baseline glycemia (threshold)</b>          |                           |
| Normoglycemic (< 110 mg/dl)                   | 63 (77.8)                 |
| Hyperglycemic (≥ 100 mg/dl)                   | 18 (22.2)                 |
| <b>BMI at baseline</b>                        |                           |
| < 25 kg/m <sup>2</sup>                        | 40 (49.4)                 |
| ≥ 25 kg/m <sup>2</sup>                        | 41 (50.6)                 |

Data are presented as N. (%) except where otherwise noted.

Abbreviations: BMI: Body Mass Index; NA: Not Available



**Table S2. Univariate analyses for OS according to clinical characteristics of advanced TNBC patients treated with platinum-based doublet chemotherapy. Related to Figure 3.**

| <b>Variables</b>                                               | <b>HR</b> | <b>95% CI</b> | <b>P value</b> |
|----------------------------------------------------------------|-----------|---------------|----------------|
| <b>Baseline glycemia</b><br>≥ 100 mg/dl vs. < 100 mg/dl        | 1.72      | 1.03 – 2.87   | 0.039*         |
| <b>Baseline glycemia</b><br>≥ 110 mg/dl vs. < 110 mg/dl        | 1.95      | 1.08 – 3.53   | 0.026*         |
| <b>Age</b><br>>65 years vs. ≤65 years                          | 0.75      | 0.42 – 1.33   | 0.318          |
| <b>ECOG PS</b><br>1 vs. 0                                      | 4.11      | 2.12 – 7.97   | < 0.001*       |
| <b>BMI</b><br>≥ 25 kg/m <sup>2</sup> vs. <25 kg/m <sup>2</sup> | 0.88      | 0.53 – 1.44   | 0.599          |
| <b>De novo metastatic disease</b><br>Yes vs. No                | 0.27      | 0.07 – 1.13   | 0.073*         |
| <b>Previous taxanes</b><br>Yes vs. No                          | 1.71      | 0.96 – 3.07   | 0.071*         |
| <b>Previous anthracyclines</b><br>Yes vs. No                   | 1.57      | 0.83 – 2.95   | 0.164          |
| <b>DFI</b><br>>36 months vs. ≤36 months                        | 0.75      | 0.45 – 1.26   | 0.274          |
| <b>N° of metastatic sites</b><br>>3 vs. ≤3                     | 2.15      | 1.13 – 4.09   | 0.020*         |
| <b>Lung metastasis</b><br>Yes vs. No                           | 1.69      | 1.02 – 2.79   | 0.043*         |
| <b>Liver metastasis</b><br>Yes vs. No                          | 1.77      | 1.01 – 3.09   | 0.047*         |
| <b>Brain metastasis</b><br>Yes vs. No                          | 1.59      | 0.72 – 3.50   | 0.250          |
| <b>Bone metastasis</b><br>Yes vs. No                           | 1.80      | 1.06 – 3.05   | 0.030*         |

\*Covariates with P value <0.1 were included in the multivariable model.

Abbreviations: HR: Hazard Ratio; CI: Confidence Interval; ECOG PS: Eastern Cooperative Oncology Group Performance Status; BMI: Body Mass Index; DFI: Disease Free Interval
